# Supplementary material for: New betulin imine derivatives with antioxidant and selective antitumor activity
Source: Royal Society of Chemistry journal article supplement (doi:10.1039/d3nj02738d), 2023-01-01
Supplement: d3nj02738d1.pdf [file d3nj02738d1.pdf]

## Supporting information for

### New betulin imine derivatives with antioxidant and selective antitumor activity

Manuela-Maria Iftime<sup>1\*</sup>, Gabriela Liliana Ailiesei<sup>1</sup>, Sergiu Shova<sup>1</sup>, Camelia Miron<sup>2</sup>, Hiromasa Tanaka<sup>2</sup>, Masaru Hori<sup>2</sup>, Luminita Marin<sup>1</sup>

<sup>1</sup>Institute of Macromolecular Chemistry “Petru Poni”, Aleea Gr. Ghica Voda, 41 A, Iasi 700487, Romania

<sup>2</sup>Center for Low-temperature Plasma Sciences, Nagoya University, Furo-cho, Chikusa-ku, Nagoya 464-8601, Japan

\*ciobanum@icmpp.ro

#### FTIR spectra

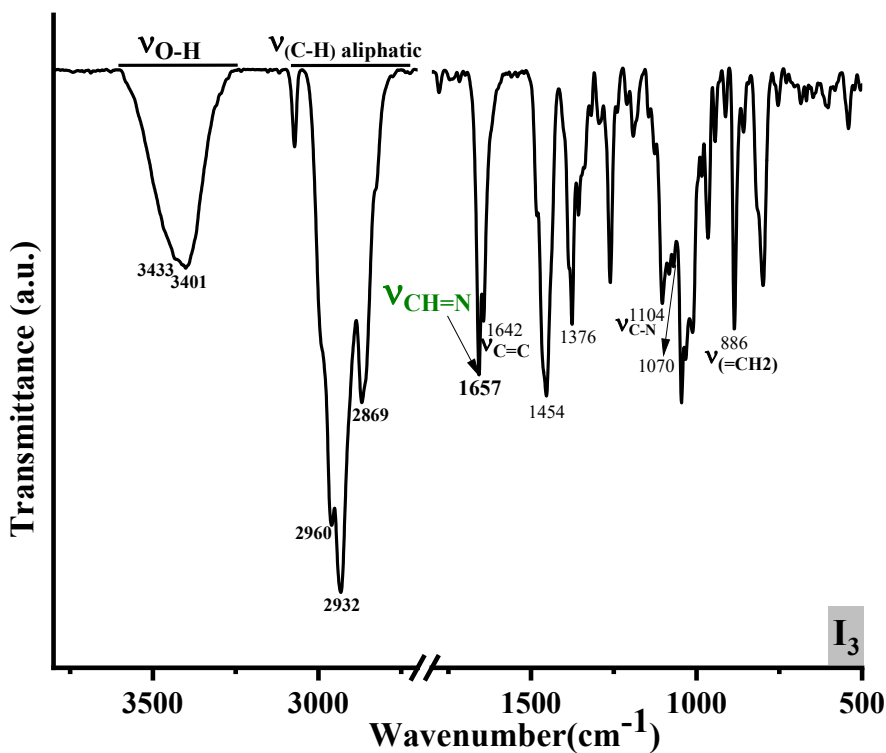

Figure 1s. FTIR spectra of I<sub>3</sub>

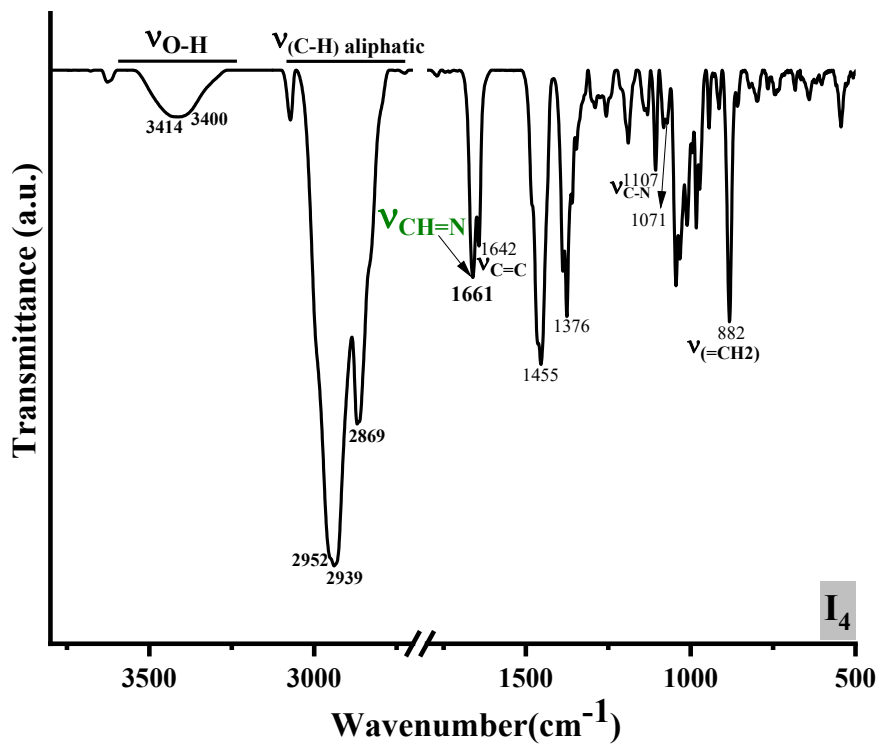

Figure 2s. FTIR spectra of **I<sub>4</sub>**

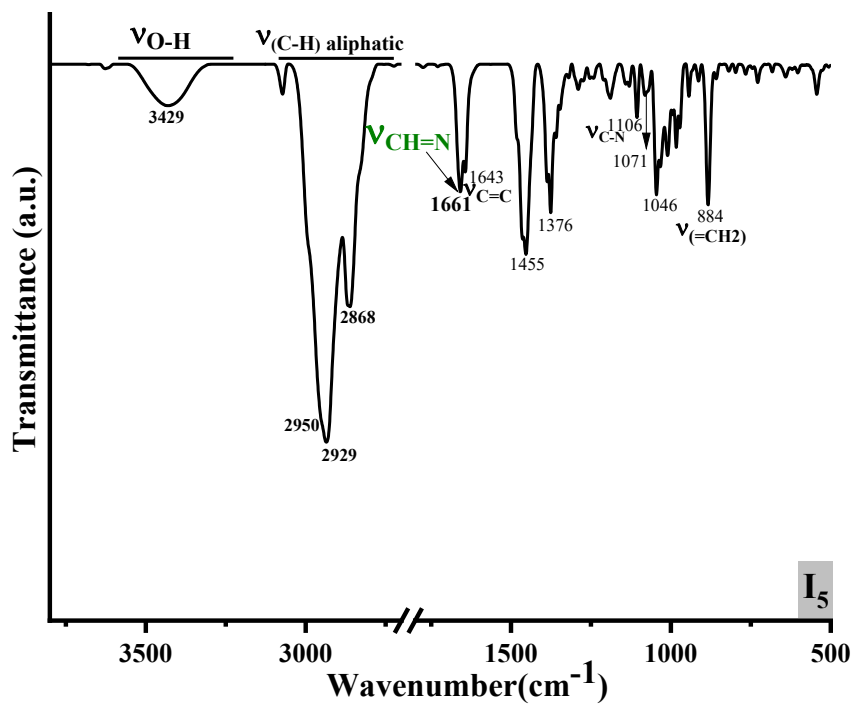

Figure 3s. FTIR spectra of **I<sub>5</sub>**

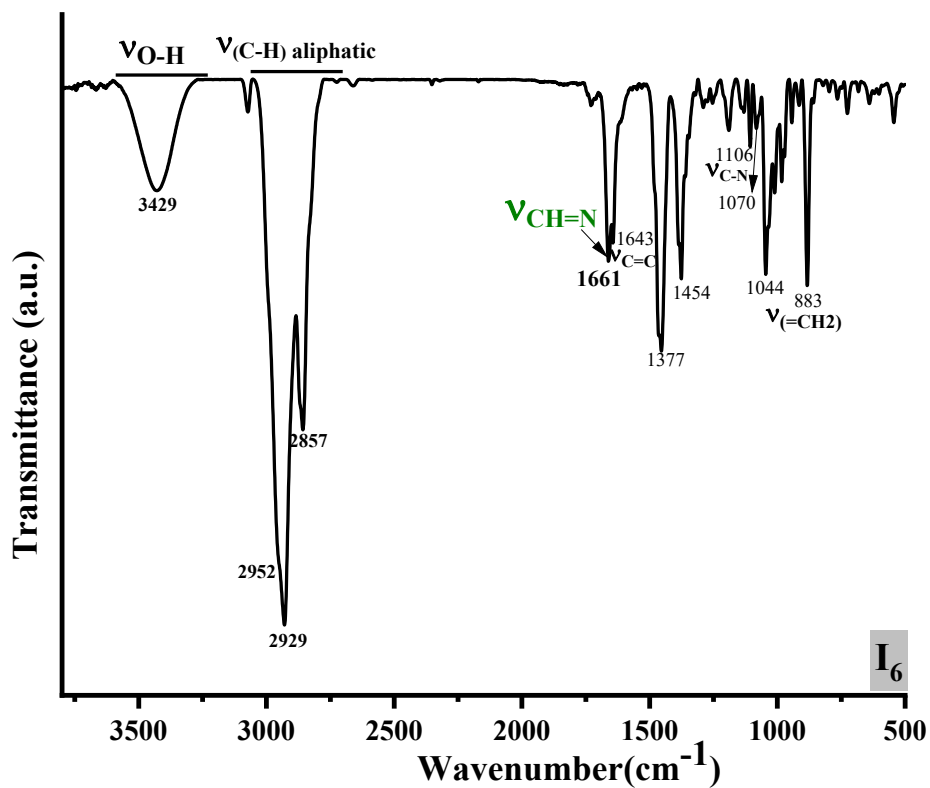

Figure 4s. FTIR spectra of **I<sub>6</sub>**

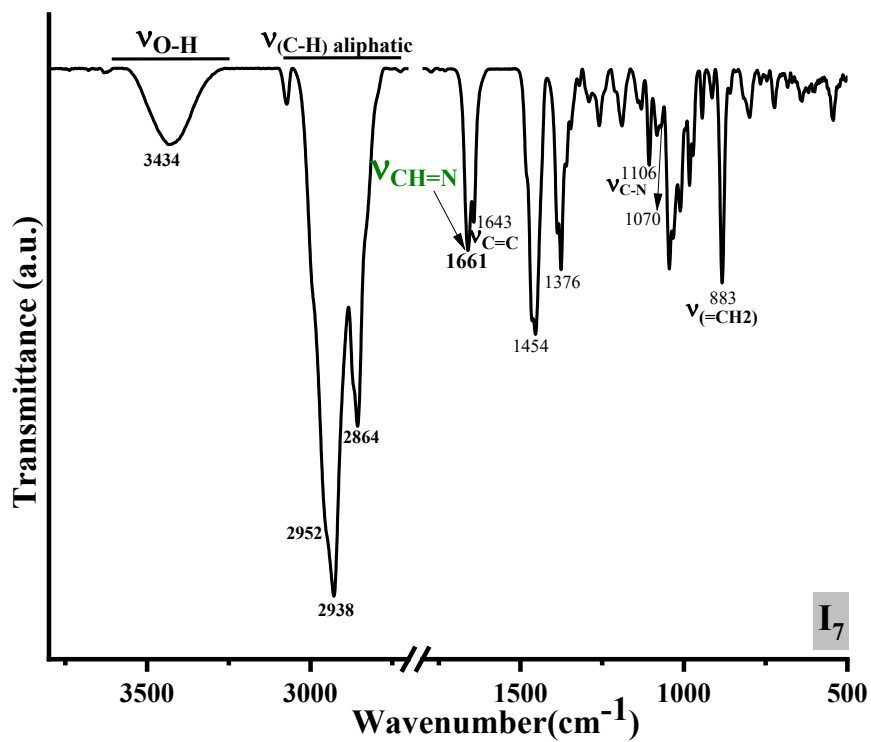

Figure 5s. FTIR spectra of **I<sub>7</sub>**

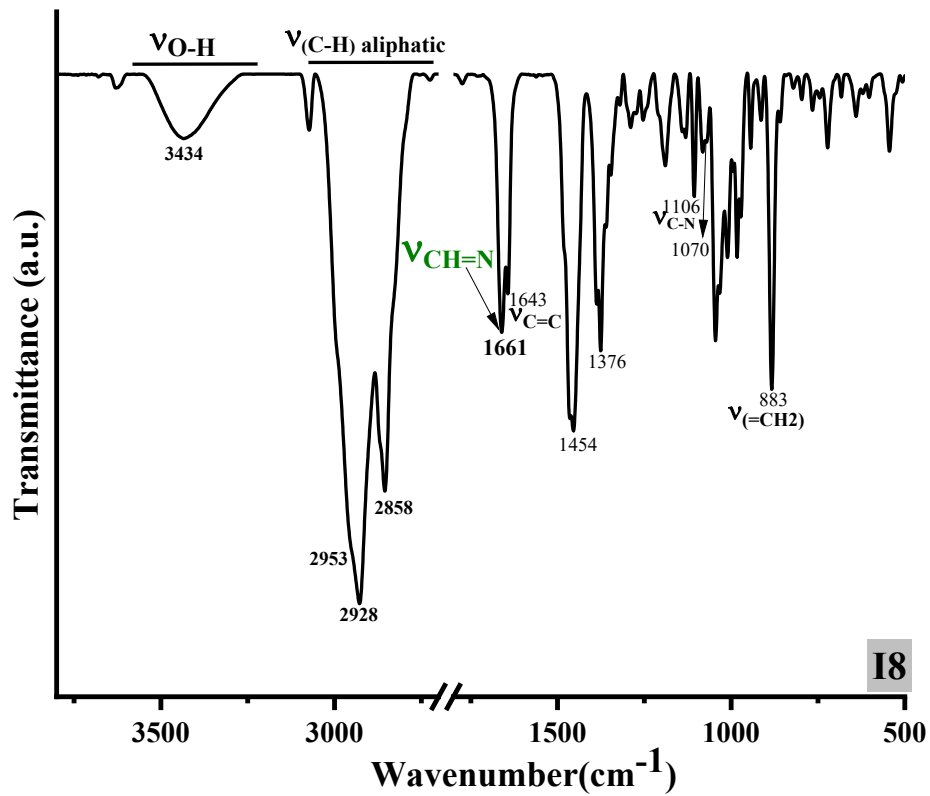

Figure 6s. FTIR spectra of **I8**

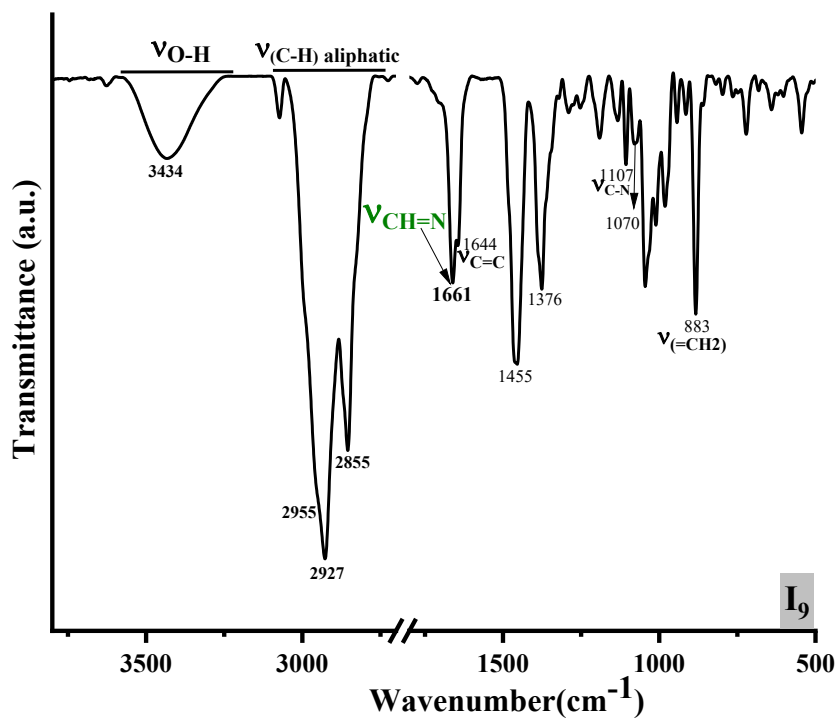

Figure 7s. FTIR spectra of **I9**

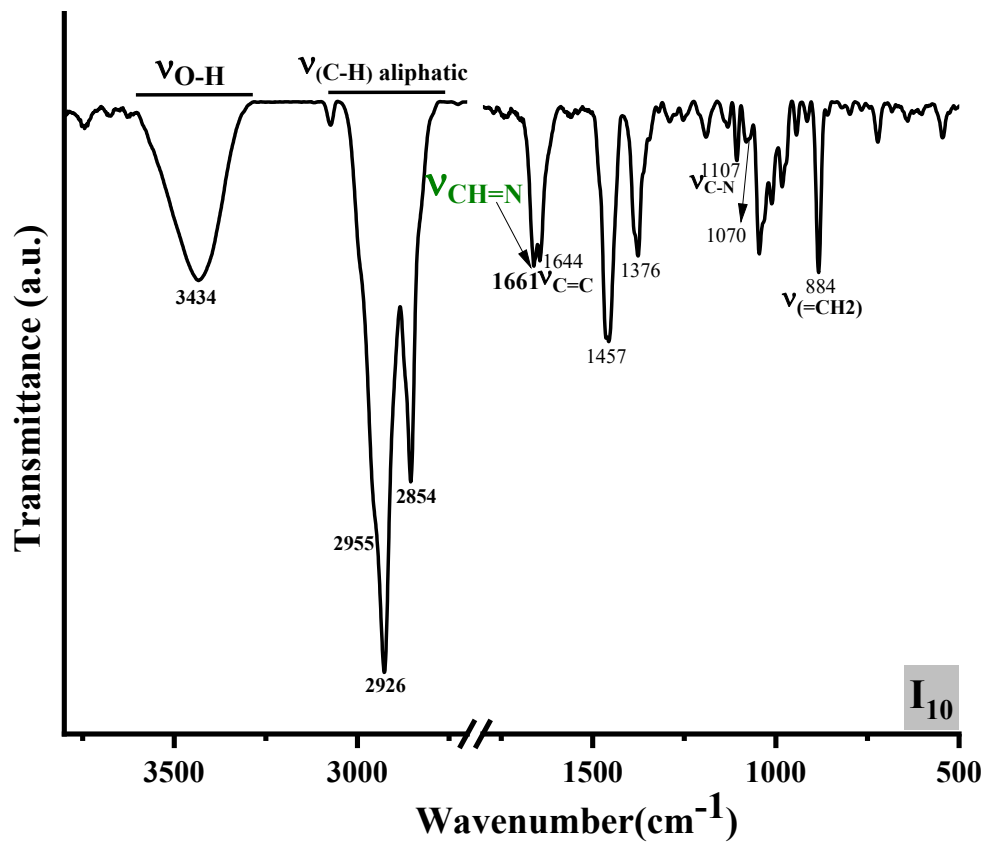

Figure 8s. FTIR spectra of I<sub>10</sub>

# <sup>1</sup>H-NMR spectra

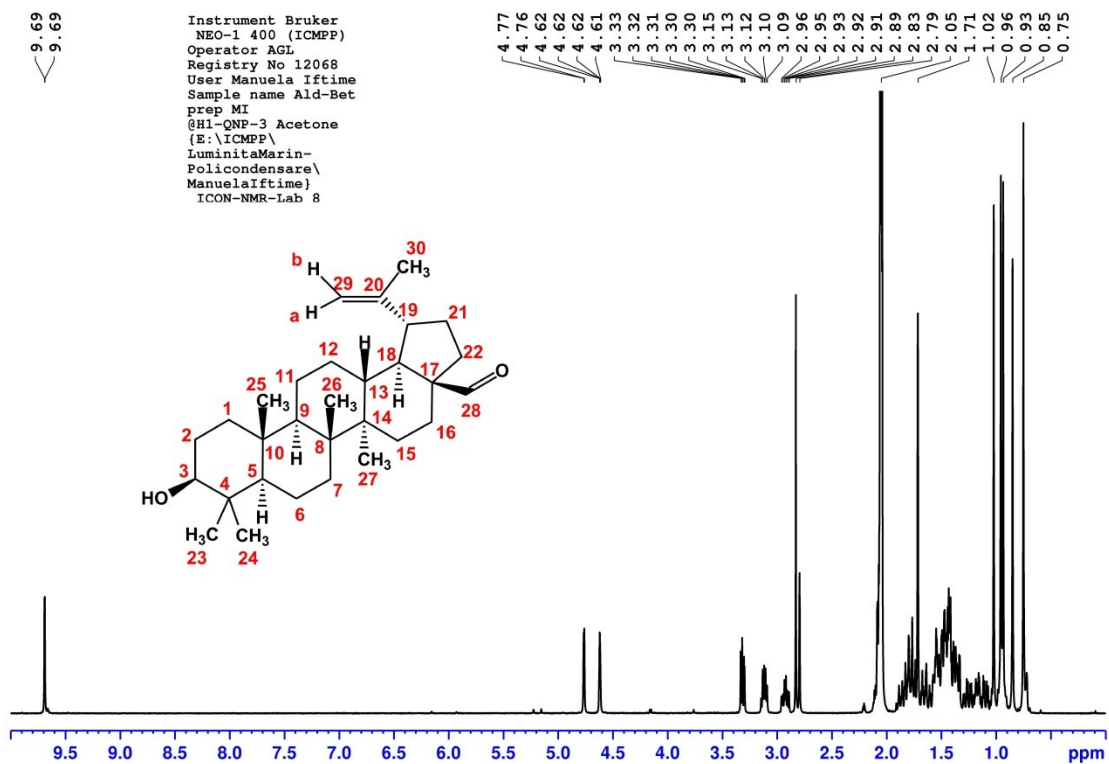

Figure 9s. <sup>1</sup>H NMR spectra of Betulinic aldehyde (B)

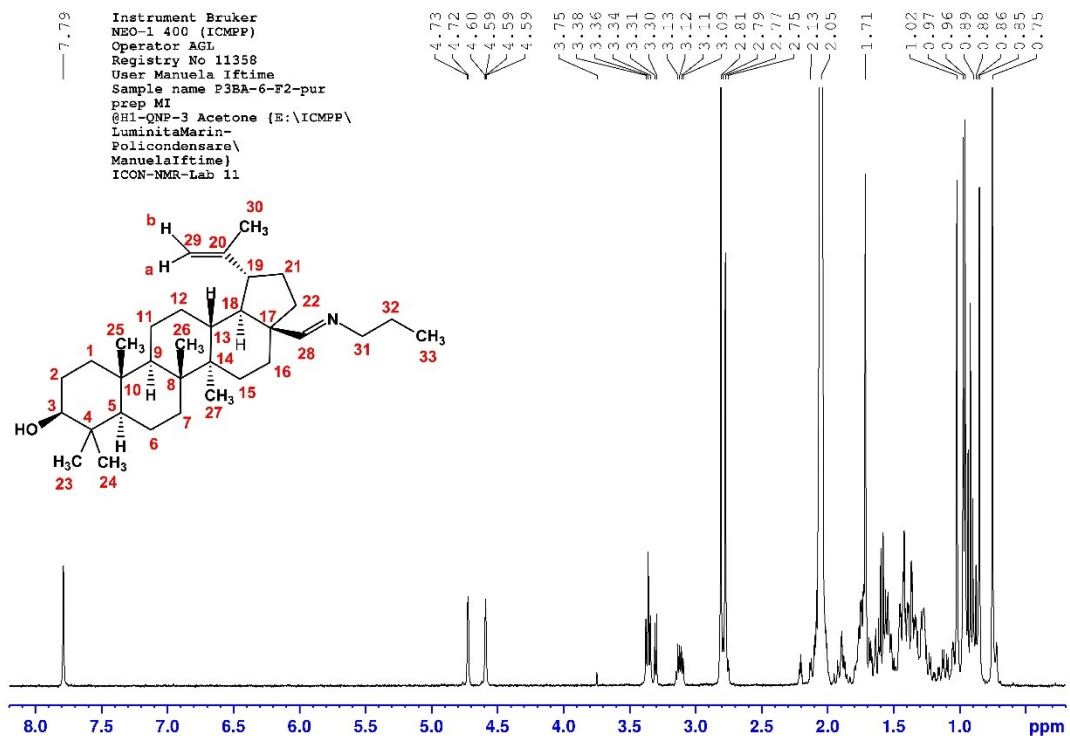

Figure 10s.  $^1\text{H}$  NMR spectra of I3

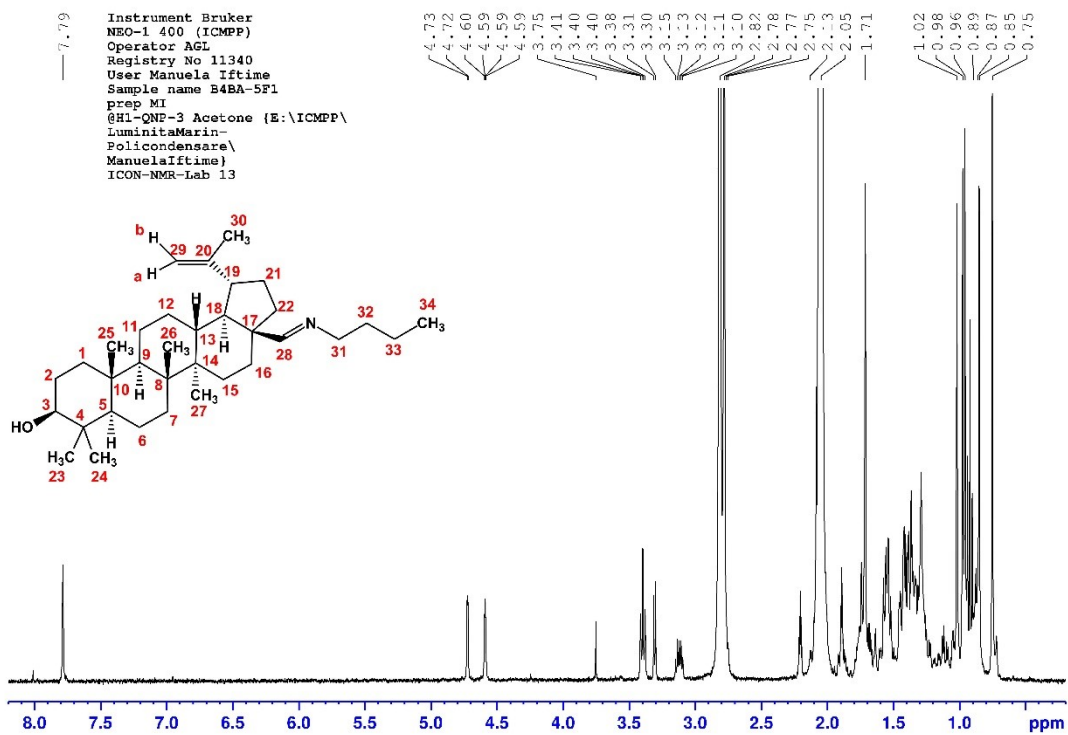

Figure 11s.  $^1\text{H}$  NMR spectra of I4

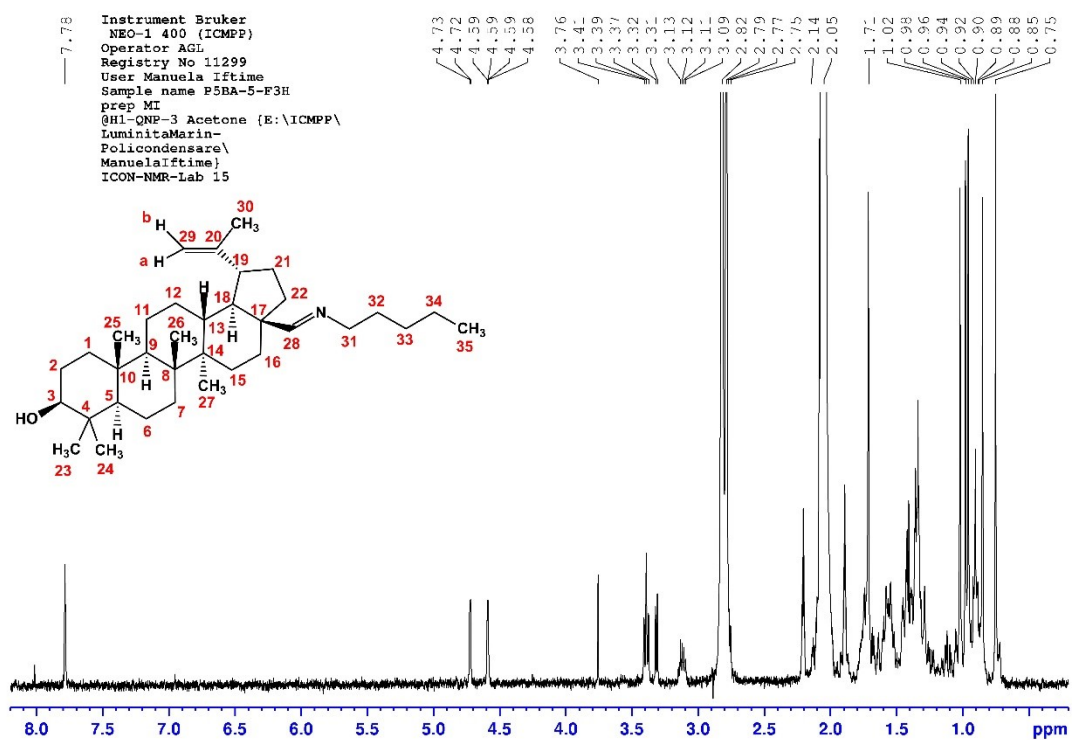

Figure 12s.  $^1\text{H}$  NMR spectra of  $\text{I}_5$

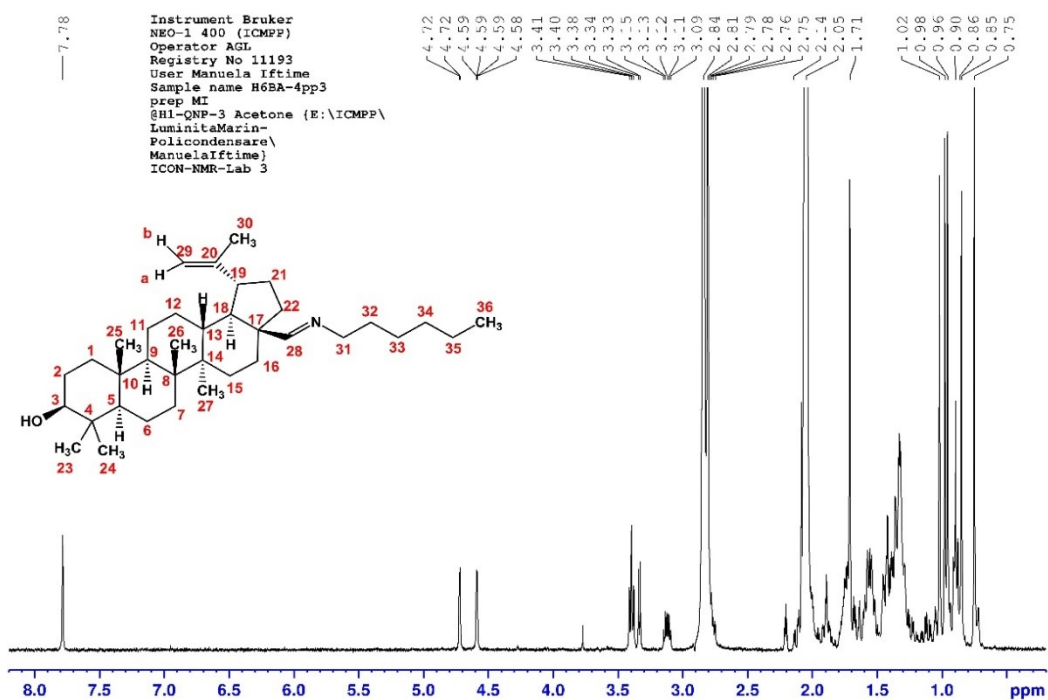

Figure 13s.  $^1\text{H}$  NMR spectra of  $\text{I}_6$



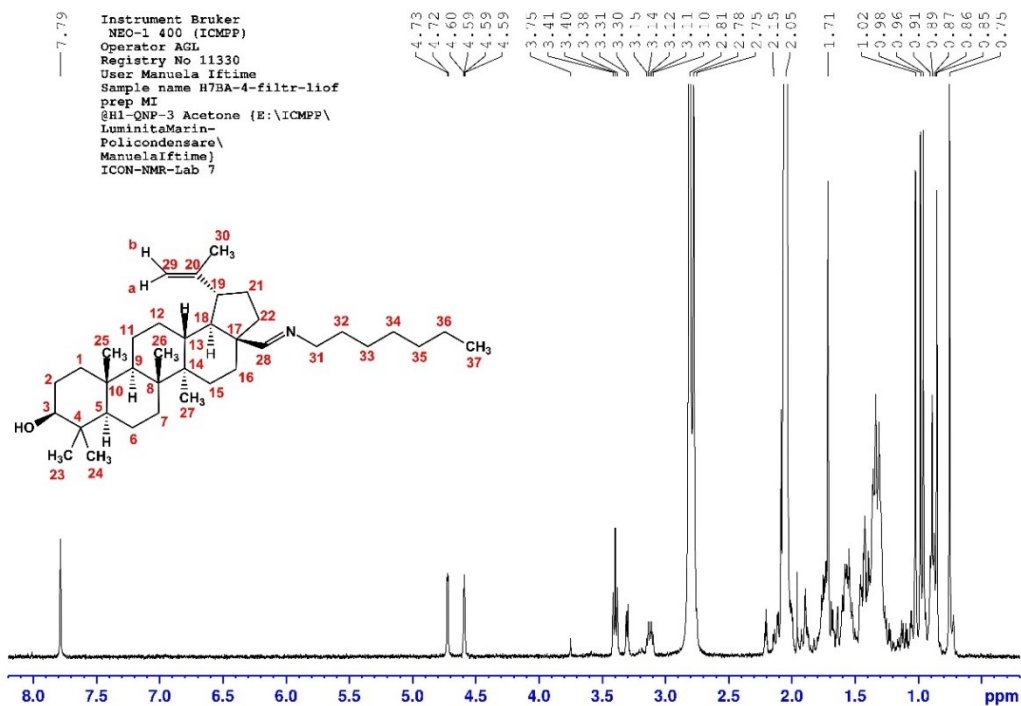

Figure 14s.  $^1\text{H}$  NMR spectra of  $\text{I}_7$

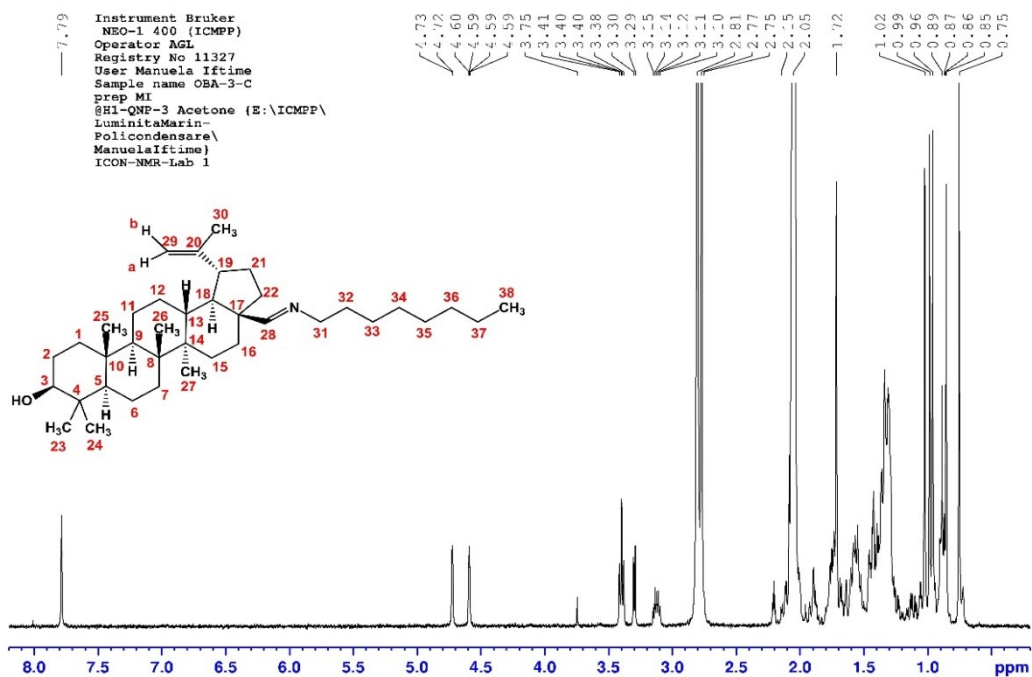

Figure 15s.  $^1\text{H}$  NMR spectra of  $\text{I}_8$

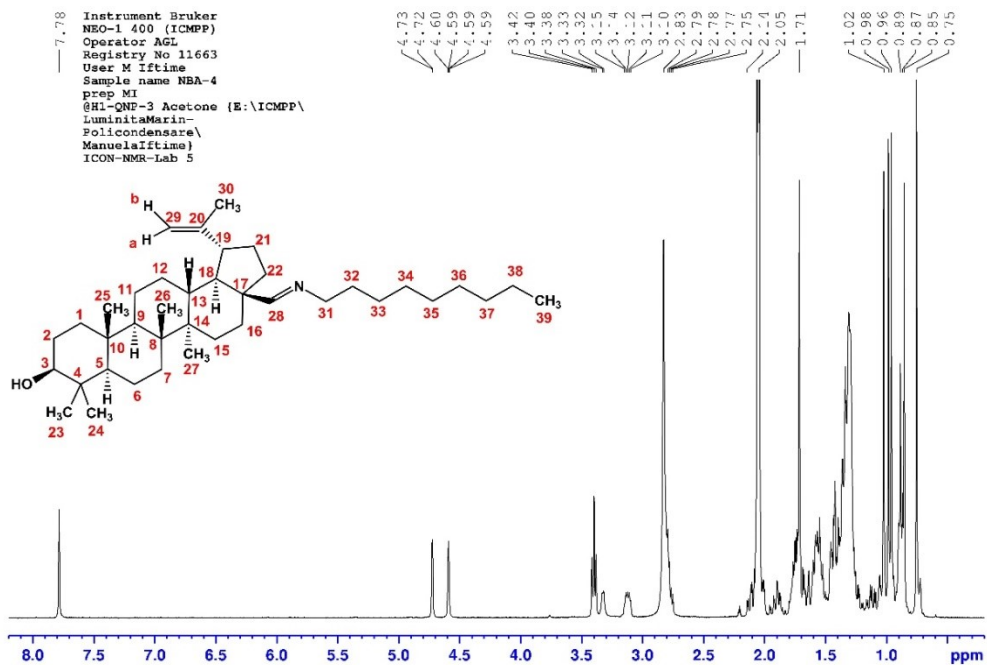

Figure 16s.  $^1\text{H}$  NMR spectra of  $\text{I}_9$

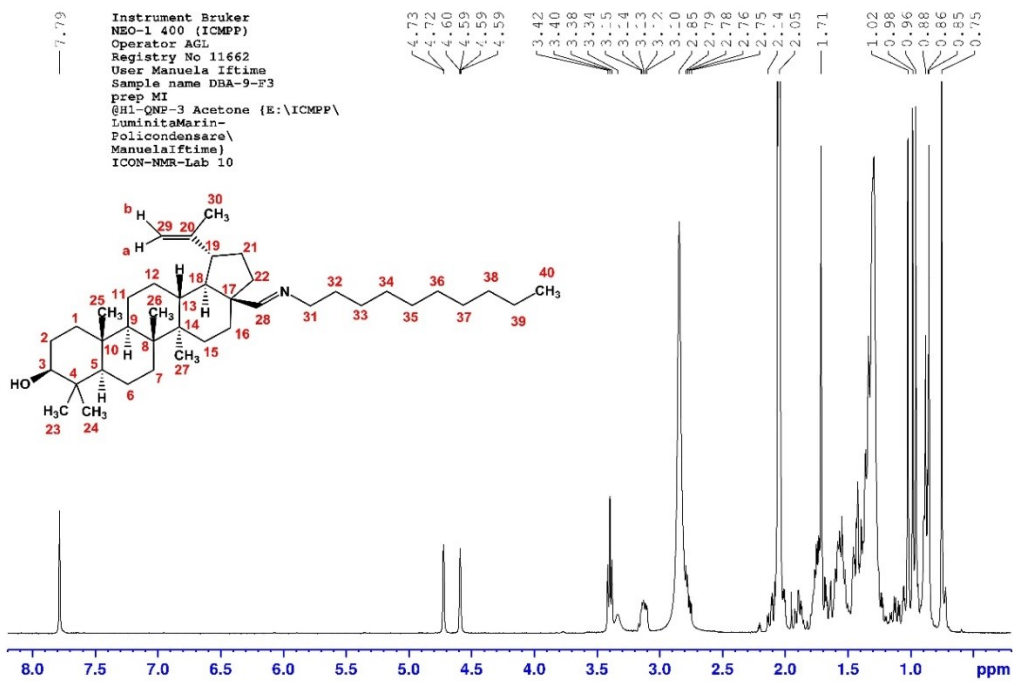

Figure 17s.  $^1\text{H}$  NMR spectra of  $\text{I}_{10}$

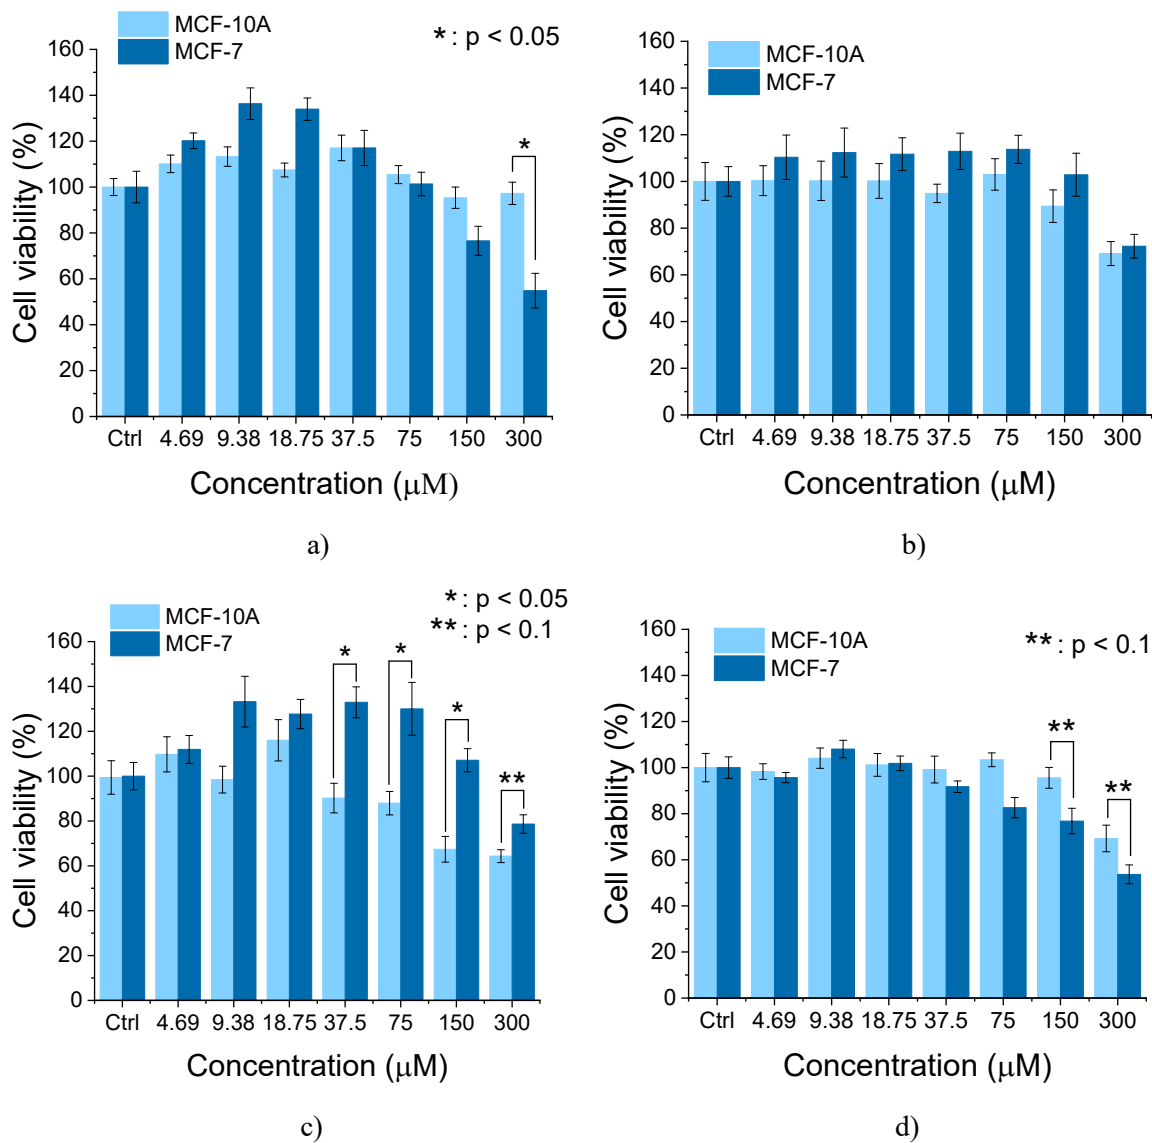

**Figure 18s.** MTS assay of MCF-7 and MCF-10A cells incubated with (a) I4, (b) I7, (c) I8, and (d) I10 aliphatic imines.

**Table 1s.** FTIR wavenumbers (cm<sup>-1</sup>) and their corresponding assignment of aliphatic imines

| Assignment                          | <b>B</b>          | <b>I<sub>3</sub></b> | <b>I<sub>4</sub></b> | <b>I<sub>5</sub></b> | <b>I<sub>6</sub></b> | <b>I<sub>7</sub></b> | <b>I<sub>8</sub></b> | <b>I<sub>9</sub></b> | <b>I<sub>10</sub></b> |
|-------------------------------------|-------------------|----------------------|----------------------|----------------------|----------------------|----------------------|----------------------|----------------------|-----------------------|
| vO-H                                | 3570<br>3474      | 3433<br>3401         | 3414<br>3400         | 3429                 | 3429                 | 3434                 | 3434                 | 3434                 | 3434                  |
| vC-H assym.<br>(-CH <sub>2</sub> -) | 2960sh<br>2938    | 2960<br>2932         | 2952<br>2939         | 2950<br>2929         | 2952<br>2929         | 2952<br>2938         | 2953<br>2928         | 2955<br>2927         | 2955<br>2926          |
| vC-H sym.(-CH <sub>2</sub> -)       | 2864              | 2869                 | 2869                 | 2868                 | 2857                 | 2864                 | 2858                 | 2855                 | 2854                  |
| vCH=N                               | -                 | 1657                 | 1661                 | 1661                 | 1661                 | 1661                 | 1661                 | 1661                 | 1661                  |
| vCH=O                               | 1723              | -                    | -                    | -                    | -                    | -                    | -                    | -                    | -                     |
| v C=C                               | 1641              | 1642                 | 1642                 | 1643                 | 1643                 | 1643                 | 1643                 | 1644                 | 1644                  |
| C-H bending<br>(-CH <sub>2</sub> )  | 1454              | 1454                 | 1455                 | 1453                 | 1454                 | 1454                 | 1454                 | 1455                 | 1457                  |
| vC-N                                | 1376              | 1376                 | 1376                 | 1376                 | 1376                 | 1376                 | 1376                 | 1376                 | 1376                  |
| vC-N str. vib.                      | 1109<br>1086<br>- | 1104<br>1083<br>1070 | 1107<br>1082<br>1071 | 1106<br>1081<br>1071 | 1106<br>1083<br>1070 | 1106<br>1082<br>1070 | 1106<br>1081<br>1070 | 1107<br>1081<br>1070 | 1107<br>1081<br>1070  |
| v (=CH <sub>2</sub> )               | 881               | 886                  | 882                  | 884                  | 883                  | 883                  | 883                  | 884                  | 884                   |

**Table 2s.** Crystal data and details of structure refinement for compounds **B**, **I<sub>3</sub>** and **I<sub>5</sub>**

|                                                           | <b>B 3357</b>                                         | <b>I<sub>3</sub> 6089</b>                             | <b>I<sub>5</sub> 6129</b>                |
|-----------------------------------------------------------|-------------------------------------------------------|-------------------------------------------------------|------------------------------------------|
| Emp. formula                                              | C <sub>61</sub> H <sub>100</sub> O <sub>5</sub>       | C <sub>33</sub> H <sub>55</sub> NO                    | C <sub>35</sub> H <sub>59</sub> NO       |
| Fw                                                        | 913.40                                                | 481.78                                                | 509.83                                   |
| T [K]                                                     | 200                                                   | 293(2)                                                | 293(2)                                   |
| space group                                               | <i>P</i> 2 <sub>1</sub> 2 <sub>1</sub> 2 <sub>1</sub> | <i>P</i> 2 <sub>1</sub> 2 <sub>1</sub> 2 <sub>1</sub> | <i>P</i> 2 <sub>1</sub> 2 <sub>1</sub> 2 |
| <i>a</i> [Å]                                              | 7.0481(6)                                             | 6.9924(8)                                             | 37.2840(16)                              |
| <i>b</i> [Å]                                              | 25.4221(9)                                            | 12.499(2)                                             | 12.3609(5)                               |
| <i>c</i> [Å]                                              | 30.6301(14)                                           | 34.223(4)                                             | 6.9822(3)                                |
| <i>V</i> [Å <sup>3</sup> ]                                | 5488.3(6)                                             | 2991.0(7)                                             | 3217.8(2)                                |
| <i>Z</i>                                                  | 4                                                     | 4                                                     | 4                                        |
| ρ <sub>calcd</sub> [g cm <sup>-3</sup> ]                  | 1.105                                                 | 1.070                                                 | 1.052                                    |
| μ [mm <sup>-1</sup> ]                                     | 0.068                                                 | 0.062                                                 | 0.061                                    |
| Crystal size [mm]                                         | 0.10 × 0.15 × 0.60                                    | 0.15 × 0.05 × 0.05                                    | 0.25 × 0.15 × 0.15                       |
| 2θ range                                                  | 3.104 to 50.05                                        | 3.47 to 50.054                                        | 3.472 to 50.048                          |
| Refls. collected                                          | 24746                                                 | 13161                                                 | 12440                                    |
| Indep. Refls., <i>R</i> <sub>int</sub>                    | 9535, 0.0412                                          | 5286, 0.0845                                          | 7245, 0.0239                             |
| Data/rests./params.                                       | 9535/0/609                                            | 5286/0/324                                            | 7245/3/327                               |
| GOF                                                       | 1.102                                                 | 0.988                                                 | 0.993                                    |
| <i>R</i> <sub>1</sub> , <i>wR</i> <sub>2</sub> (all data) | 0.0735, 0.1390                                        | 0.0843, 0.1557                                        | 0.0822, 0.2361                           |
| CCDC no.                                                  | <b>2257742</b>                                        | <b>2257743</b>                                        | <b>2257744</b>                           |

**Table 3s.** Solubility of the aliphatic imines in common solvents

| Solvent           | $\delta$ | I <sub>3</sub> | I <sub>4</sub> | I <sub>5</sub> | I <sub>6</sub> | I <sub>7</sub> | I <sub>8</sub> | I <sub>9</sub> | I <sub>10</sub> |
|-------------------|----------|----------------|----------------|----------------|----------------|----------------|----------------|----------------|-----------------|
| Water             | 23.43    | -              | -              | -              | -              | -              | -              | -              | -               |
| Methanol          | 14.48    | +              | +              | +              | +              | +              | +              | +              | +               |
| Ethanol           | 12.98    | +              | +              | +              | +              | +              | +              | +              | +               |
| <i>n</i> -butanol | 11.32    | +              | +              | +              | +              | +              | +              | +              | +               |
| Dimethylsulfoxide | 13.04    | +              | +              | +              | +              | +              | +              | +              | +               |
| Dichloromethane   | 9.9      | +              | +              | +              | +              | +              | +              | +              | +               |
| Acetone           | 9.75     | +              | +              | +              | +              | +              | +              | +              | +               |
| Acetonitrile      | 15.3     | +              | +              | +              | +              | +              | +              | +              | +               |
| Ethyl acetate     | 9.1      | +              | +              | +              | +              | +              | +              | +              | +               |
| Hexane            | 7.24     | +              | +              | +              | +              | +              | +              | +              | +               |

+: soluble at room temperature; -: insoluble.

<sup>a</sup> Solvent solubility parameter (cal cm<sup>-3</sup>)<sup>1/2</sup>

**Table 4s.** Thermal behavior of the studied aliphatic imine and betulinic aldehyde

| Code                  | T <sub>m</sub> <sup>a</sup> | T <sub>5%</sub> <sup>b</sup> | T <sub>10%</sub> <sup>c</sup> | T <sub>dec</sub> <sup>d</sup> |
|-----------------------|-----------------------------|------------------------------|-------------------------------|-------------------------------|
| <b>B</b>              | 167-170                     | 227                          | 257                           | 310, 394                      |
| <b>I<sub>3</sub></b>  | 129-133                     | 250                          | 261                           | 302                           |
| <b>I<sub>4</sub></b>  | 120-122                     | -                            | -                             | -                             |
| <b>I<sub>5</sub></b>  | 116-123                     | 252                          | 263                           | 312                           |
| <b>I<sub>6</sub></b>  | 105-113                     | -                            | -                             | -                             |
| <b>I<sub>7</sub></b>  | 76-80                       | 262                          | 278                           | 328                           |
| <b>I<sub>8</sub></b>  | 50-66                       | -                            | -                             | -                             |
| <b>I<sub>9</sub></b>  | 46-57                       | -                            | -                             | -                             |
| <b>I<sub>10</sub></b> | 42-50                       | -                            | -                             | -                             |

<sup>a</sup>T<sub>m</sub>% = melting temperature and softening temperature range determined by POM;

<sup>b</sup>T<sub>5%</sub> = temperature corresponding to 5% mass loss;

<sup>c</sup>T<sub>10%</sub> = temperature corresponding to 10% mass loss;

<sup>d</sup>T<sub>dec</sub> = temperature corresponding to the maximum degradation rate
